# Supplementary material for: Acute Genetic Damage Induced by Ethanol and Corticosterone Seems to Modulate Hippocampal Astrocyte Signaling
Source: Hindawi journal article supplement (doi:10.1155/2024/5524487), 2024-02-26
Supplement: f1 [file 5524487.f1.pdf]

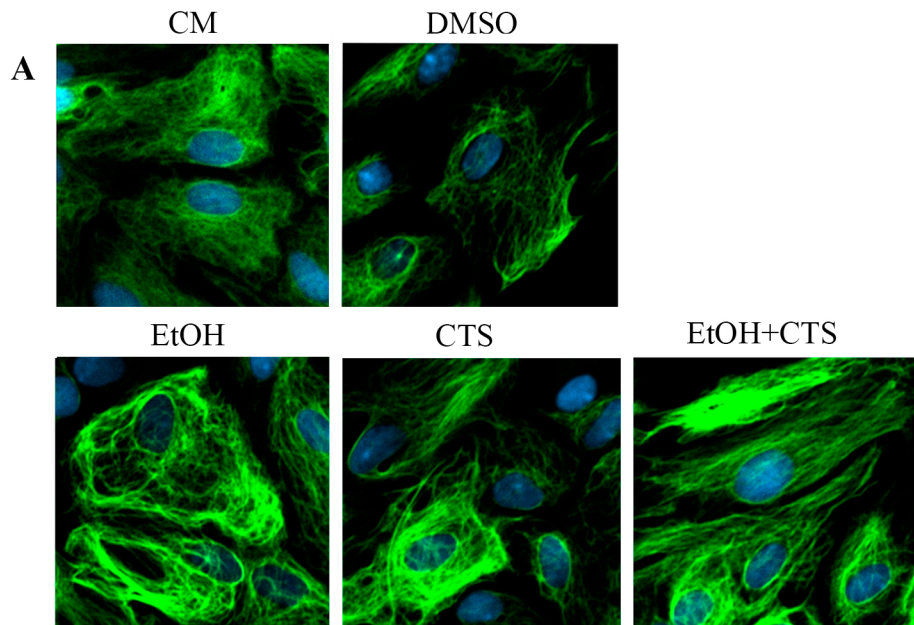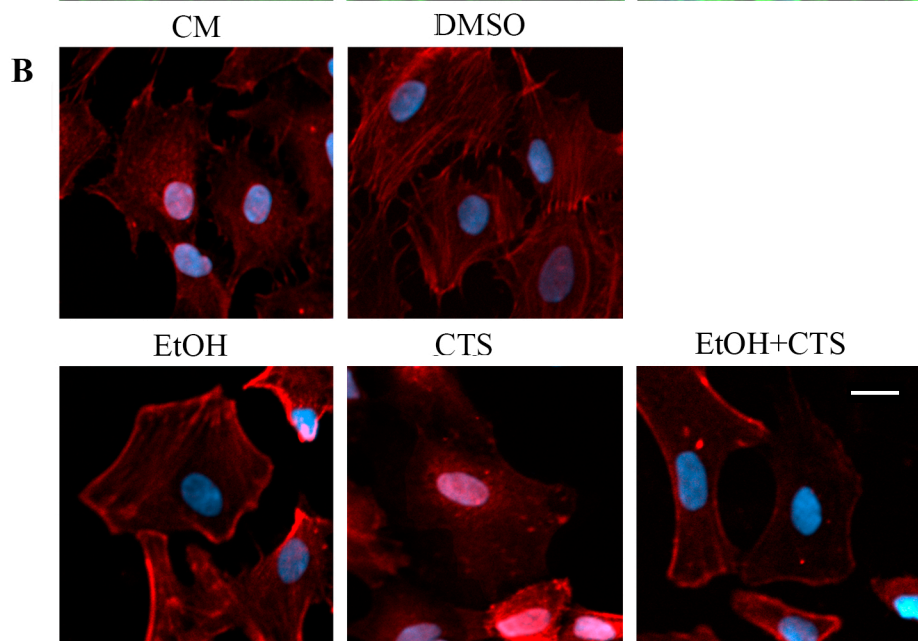

 DAPI     GFAP     Phalloidin
